# Supplementary material for: Monoclinic hafnium oxynitride supported on reduced graphene oxide to catalyse the oxygen reduction reaction in acidic media
Source: Royal Society of Chemistry journal article supplement (doi:10.1039/c4cp03210a), 2014-01-01
Supplement: c4cp03210a1.pdf [file c4cp03210a1.pdf]

## Supplementary Information

# Monoclinic Hafnium Oxynitride Supported on Reduced Graphene Oxide to Catalyse the Oxygen Reduction Reaction in Acid Media

*Mitsuharu Chisaka,<sup>a,\*</sup> Hirohito Sasaki<sup>a</sup> and Hirokazu Muramoto<sup>b</sup>*

<sup>a</sup> Department of Electronics and Information Technology, Hirosaki University,

3 Bunkyo-cho, Hirosaki, Aomori 036-8561, Japan.

<sup>b</sup> Cooperative Research Facility Center, Toyohashi University of Technology,

1-1 Hibarigaoka, Tempaku, Toyohashi, Aichi 441-8580, Japan.

\*Corresponding author

Phone/Fax: +81 172 39 3559

E-mail: [chisaka@eit.hirosaki-u.ac.jp](mailto:chisaka@eit.hirosaki-u.ac.jp)

### S1. Effect of hydrothermal-treatment temperature on mass activity of $\text{HfO}_x\text{N}_y\text{-rGO}$ .

Figure S1 shows mass activity versus potential  $[(i_O - i_N) m^{-1} - E]$  curves of  $\text{HfO}_x\text{N}_y\text{-rGO}$  for four different hydrothermally-treated temperature,  $T$  followed by the pyrolysis under  $\text{N}_2$  gas at a fixed condition of 1073 K for 2 h. The optimum  $T$  for the mass activity was 453 K, agree well with the results from Fig. 2.

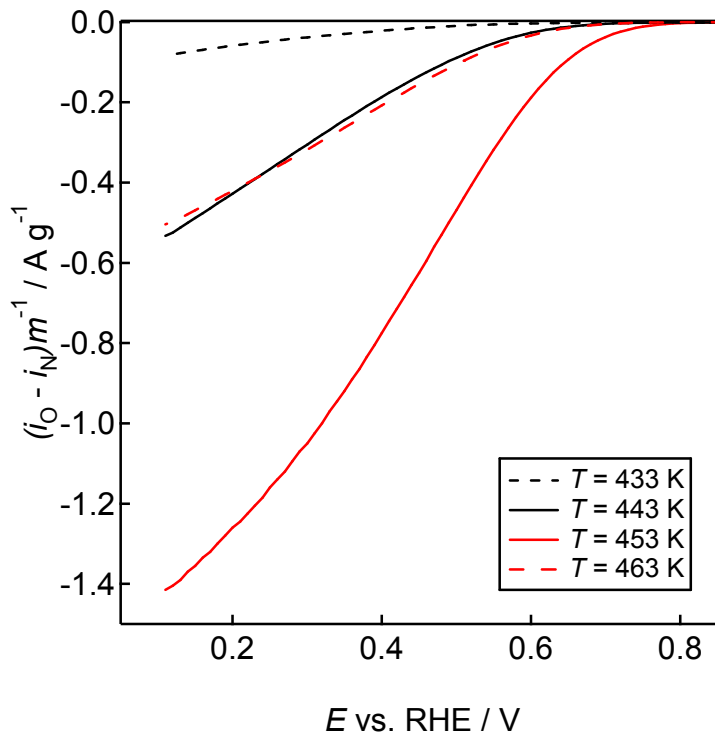

**Fig. S1.** Mass activity versus potential  $[(i_O - i_N) m^{-1} - E]$  curves of  $\text{HfO}_x\text{N}_y\text{-rGO}$  hydrothermally-synthesized at four different  $T$  of 433 K, 443 K, 453 K, and 463 K and followed by the pyrolysis under flowing  $\text{N}_2$  gas at a fixed condition of 1073 K for 2 h.

## S2. The ORR selectivity of HfO<sub>x</sub>N<sub>y</sub>-rGO.

Rotating ring-disk electrode (RRDE) voltammograms were obtained to help evaluate the ORR selectivity of HfO<sub>x</sub>N<sub>y</sub>-rGO which showed the maximum activity. Using a glassy carbon (GC) disk (4 mm diameter)–platinum ring (5 mm inner diameter and 7 mm outer diameter) electrode as a working electrode, three electrode cells were prepared as described in the main body of the text. RRDE voltammograms were recorded in the disk potential range of 0.11–1.26 V at a scan rate of 5 mV s<sup>-1</sup>, while keeping the ring electrode potential at 1.26 V, with a rotation speed of 1500 rpm after bubbling O<sub>2</sub> or N<sub>2</sub> for 1800 s. Fig. S2 shows a RRDE voltammogram of the HfO<sub>x</sub>N<sub>y</sub>-rGO. The  $n$  value was calculated with the following equation:

$$n = -4(I_{dO} - I_{dN}) / [-(I_{dO} - I_{dN}) + (I_{rO} - I_{rN})/N] \quad (S1)$$

where  $I_{dX}$  and  $I_{rX}$  denote disk and ring current obtained under X (X = O or N and corresponds to either oxygen or nitrogen, respectively) atmosphere, respectively, and  $N$  is the collection efficiency provided by the manufacturer, 0.424. At  $E = 0.6$  V,  $n$  was 3.4 and gradually increased to 3.6 with decreasing  $E$  to 0.06 V.

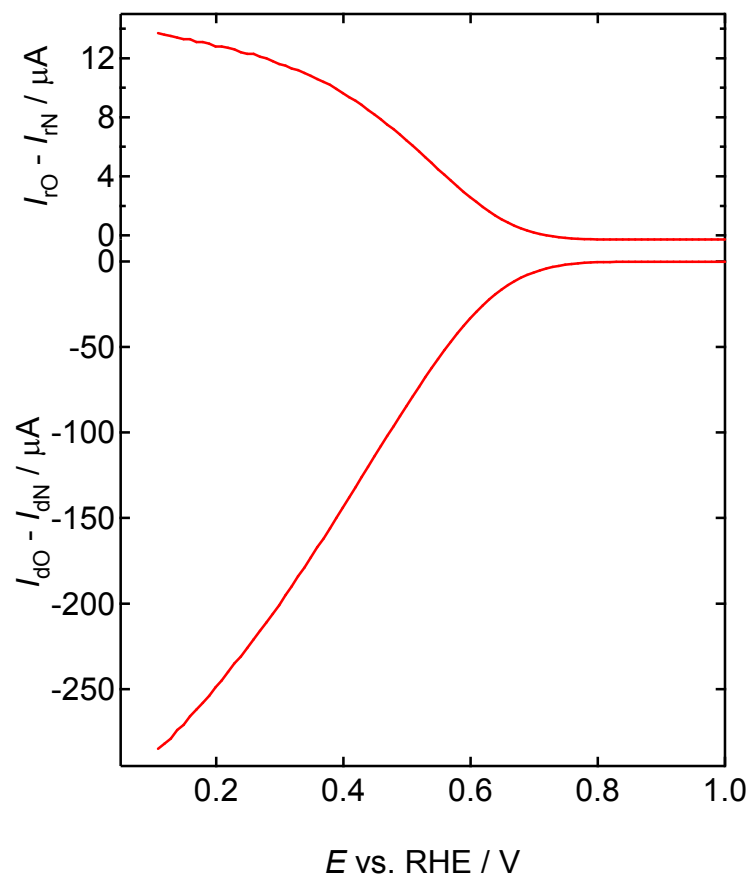

**Fig. S2** A RRDE voltammogram of  $HfO_xN_y$ -rGO hydrothermally synthesized at 453 K after pyrolysis. Scans were performed under  $N_2$  and  $O_2$  with a rotation speed of 1500 rpm at a scan rate of  $5 \text{ mV s}^{-1}$  in  $0.1 \text{ mol dm}^{-3} H_2SO_4$ .

### S3. Fitting results for a N 1s spectrum of HfO<sub>x</sub>N<sub>y</sub>-rGO.

The N 1s spectrum of HfO<sub>x</sub>N<sub>y</sub>-rGO which showed the maximum activity was deconvoluted into two peaks assigned to Hf-N bonding (~396 eV)<sup>18</sup> and C-N bonding (398–402 eV)<sup>18,19</sup> as shown in Fig. S3. This catalyst was hydrothermally synthesized at 453 K and followed by pyrolysis at 1073 K. It is noted that the aspect ratio (horizontal to vertical ratio) used in Fig. S3 is different from that shown in Fig. 5; however, the spectrum is the same. A weak peak assigned to Hf-N bonding is clearly seen in the spectrum. The result from XRD patterns (Fig. 4) and XPS analyses (Fig. 5 and Fig. S3) revealed that small amount of oxygen atoms in monoclinic HfO<sub>2</sub> phase were substituted by nitrogen atoms by the hydrothermal treatment. The nitrogen doping level, *y* in HfO<sub>x</sub>N<sub>y</sub> of this sample calculated from the peak assigned to Hf-N bonding in N 1s spectrum and Hf 4f spectrum is 0.08, one order of magnitude lower than that of HfO<sub>x</sub>N<sub>y</sub> nanoparticles synthesized using NH<sub>3</sub>-gas pyrolysis.<sup>11</sup>

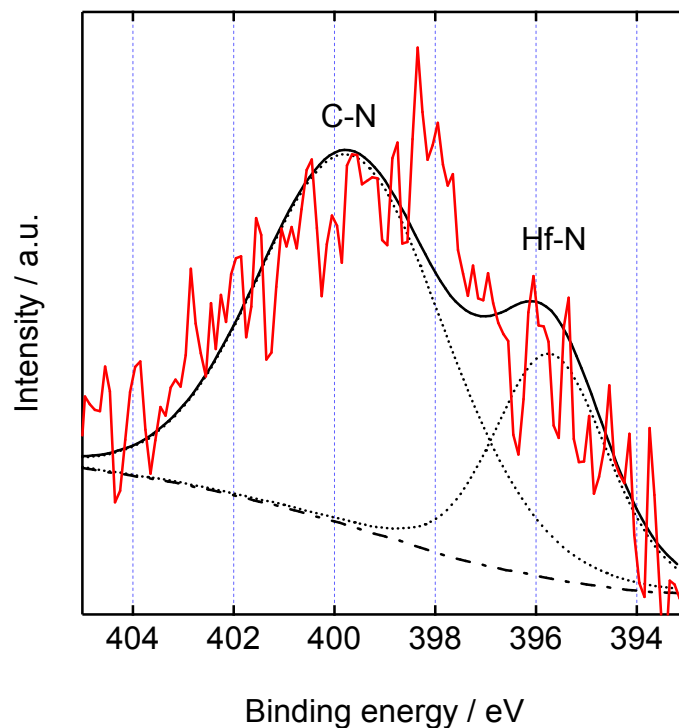

**Fig. S3** A N 1s spectrum of  $\text{HfO}_x\text{N}_y$ -rGO hydrothermally synthesized at 453 K after pyrolysis shown in Fig. 5 (d) with overall fitting (solid line) and deconvolution into two peaks assigned to Hf-N bonding ( $\sim 396$  eV) and C-N bonding (398–402 eV) (dashed lines) after subtracting Shirley-type background (dash-dotted line).

#### S4. Reduction of GO.

Fig. S4 shows C 1s spectra of all  $\text{HfO}_x\text{N}_y\text{-rGO}$  samples, both from before and after pyrolysis. Although these spectra should contain contribution from the contaminants in spectrometer, they were used to evaluate the reduction degree of GO sheets with a rough assumption that the contaminant contribution to all the samples were almost the same. When  $T$  is the lowest value of 384 K, two clear peaks are observed from the spectrum before and after pyrolysis: the larger peak is centered at  $\sim 284.8$  eV assigned to C-C/C=C bonding and the smaller one is at  $\sim 288.6$  eV assigned to C=O bonding.<sup>S1,S2</sup> The smaller peak disappeared at  $T \geq 433$  K, suggesting that GO surface was reduced to break the C=O bonding after the hydrothermal-treatment performed at this  $T$  range. The asymmetric peaks observed from the spectra at  $T \geq 433$  K suggest that small peaks assigned to C-N bonding and/or C-O bonding are present. However, deconvolution is not possible as the peak binding energies for these bonding states are so close each other: 285.8 eV for C-N bonding<sup>S3</sup> and 285.9 eV for C-O bonding.<sup>S1</sup> All the C 1s spectra were not significantly changed by the pyrolysis indicating that the pyrolysis did not affect the bonding states of GO.

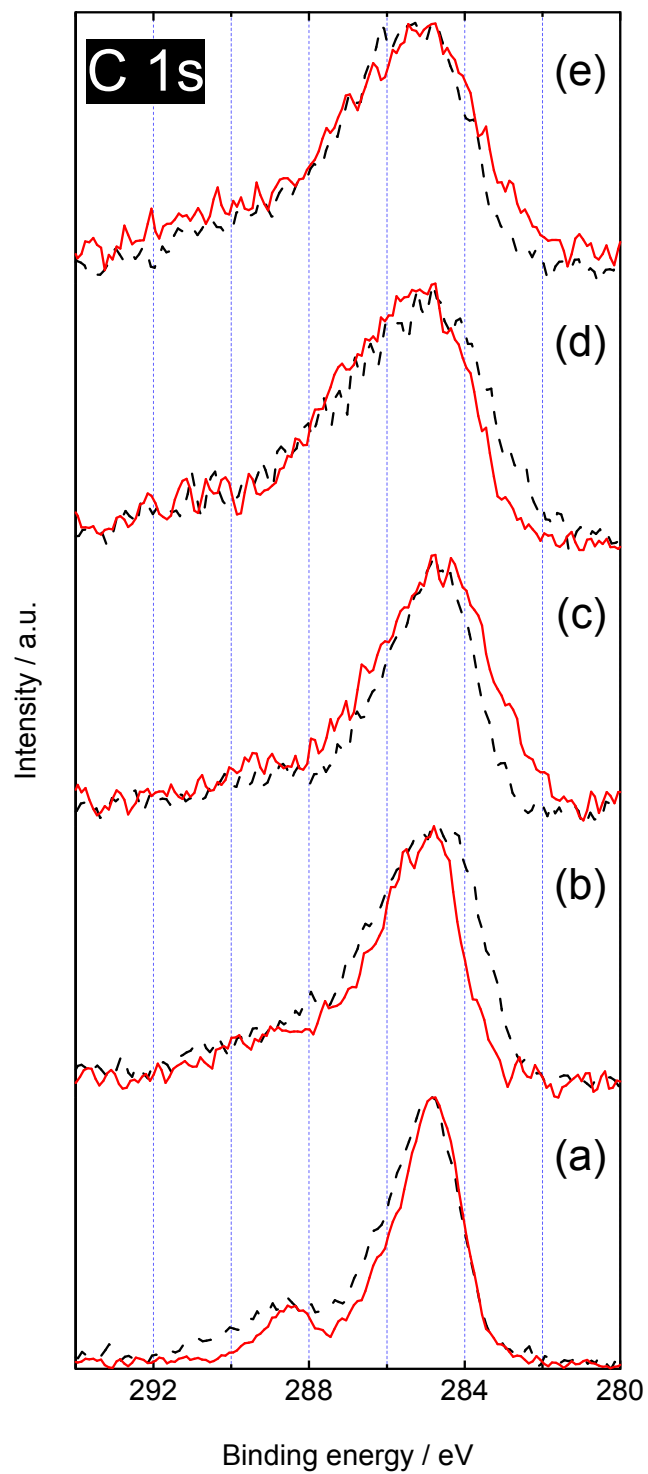

**Fig. S4** C 1s spectra of  $\text{HfO}_x\text{N}_y\text{-rGO}$  hydrothermally synthesized at (a) 384 K, (b) 433 K, (c) 443 K, (d) 453 K, and (e) 463 K before (dashed line) and after (solid line) pyrolysis.



## References

- S1 H. Zhang, X. Lv, Y. Li, Y. Wang, and J. Li, *ACS Nano*, 2010, **4**, 380.
- S2 C. Y. Su, Y. Xu, W. Zhang, J. Zhao, A. Liu, X. Tang, C. H. Tsai, Y. Huang, and L. J. Li, *ACS Nano*, 2010, **4**, 5285.
- S3 M. Tabbal, P. Mérel, S. Moisa, M. Chaker, A. Ricard, and M. Moisan, *Appl. Phys. Lett.*, 1996, **69**, 1698.
